# Supplementary material for: A stable JAZ protein from peach mediates the transition from outcrossing to self-pollination
Source: PubMed Central journal article supplement (PMC4364584; doi:10.1186/s12915-015-0124-6), 2015-02-13
Supplement: 12915_2015_124_MOESM1_ESM.pdf [file 12915_2015_124_MOESM1_ESM.pdf]

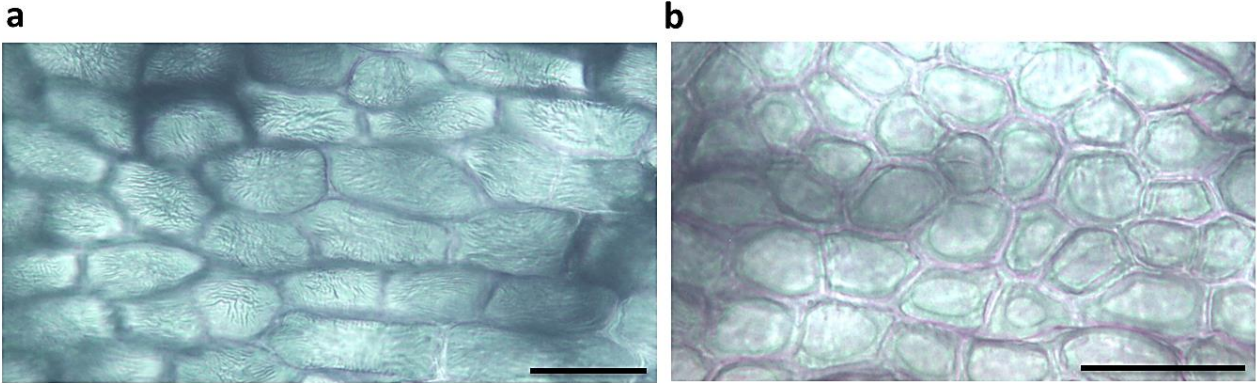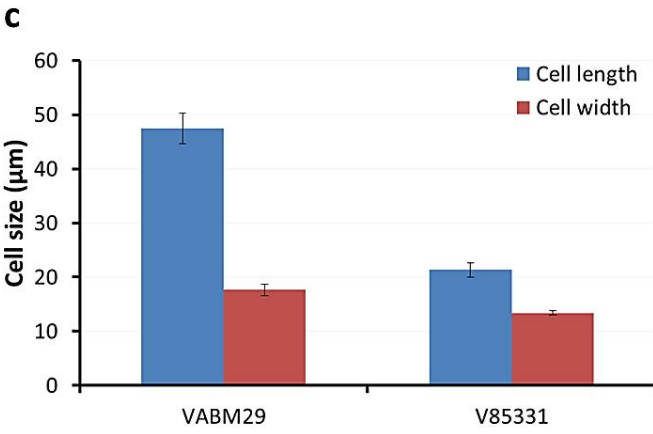

**Figure S1: Showy and non-showy appearance in peach is attributed to cell size.** Micrographs showing cell length and cell width ( $\mu\text{m}$ ) in petals of VABM29 (a) and V85331 (b) flowers taken at the anthesis stage. Scale bar =  $40 \mu\text{m}$ . Length and width of petals cells in VABM29 ( $n = 25$ ) and V85331 ( $n = 25$ ) (c).
