# Supplementary material for: A stable JAZ protein from peach mediates the transition from outcrossing to self-pollination
Source: PubMed Central journal article supplement (PMC4364584; doi:10.1186/s12915-015-0124-6), 2015-02-13
Supplement: 12915_2015_124_MOESM2_ESM.pdf [file 12915_2015_124_MOESM2_ESM.pdf]

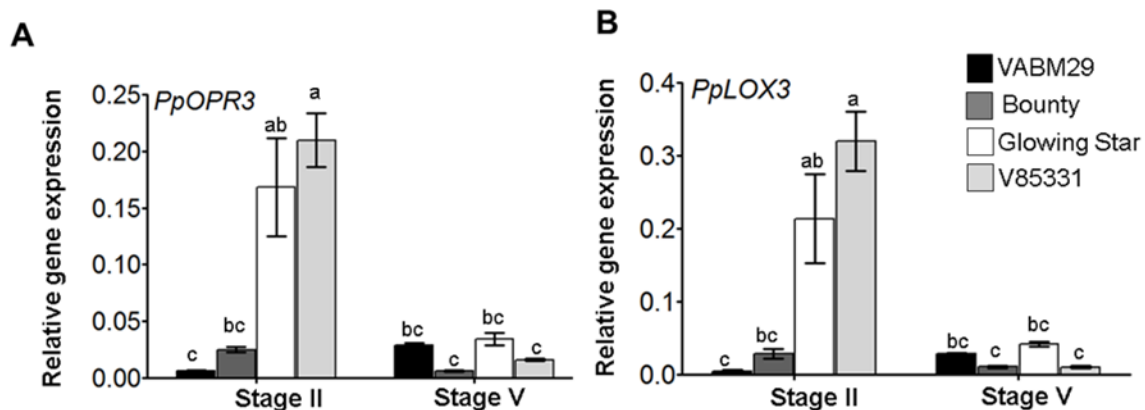

**Figure S2: Expression of JA biosynthesis genes in peach flowers.** The expression of two JA-biosynthesis genes, *PpLOX3* (a) and *PpOPR3* (b) were quantified in flowers of showy and non-showy varieties at 0% (Stage II) and at 100 % anther dehiscence (Stage V). The expression of each gene was normalized to that of *Ppactin*. Values are the mean and standard error of three biological replicates. Means in each column having the same letter are not significantly different ( $P < 0.05$ , Tukey-Kramer HSD test).
