# Supplementary material for: A stable JAZ protein from peach mediates the transition from outcrossing to self-pollination
Source: PubMed Central journal article supplement (PMC4364584; doi:10.1186/s12915-015-0124-6), 2015-02-13
Supplement: 12915_2015_124_MOESM4_ESM.pdf [file 12915_2015_124_MOESM4_ESM.pdf]

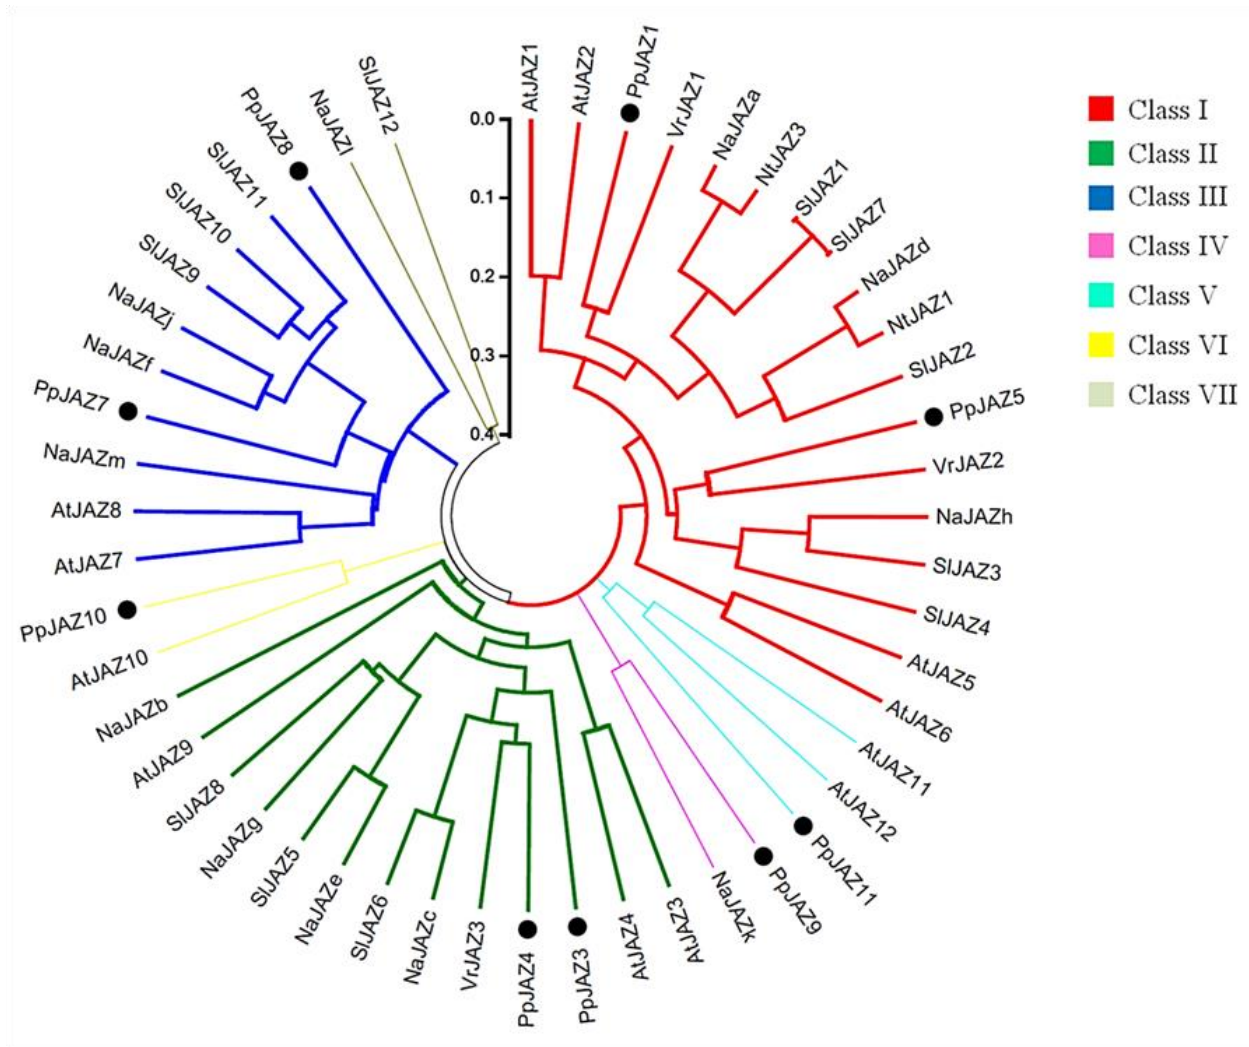

**Figure S3: Phylogenetic analysis of peach JAZ proteins.** Phylogenetic tree was constructed based on the available sequences for *Arabidopsis thaliana* (At), *Nicotiana attenuate* (Na), *Solanum lycopersicum* (Sl), *Vitis rupestris* (Vr), *Nicotina tabacum* (Nt) along with *Prunus persica* (Pp) JAZ proteins. PpJAZ proteins were indicated by black circles in the phylogram.
