# Supplementary material for: A stable JAZ protein from peach mediates the transition from outcrossing to self-pollination
Source: PubMed Central journal article supplement (PMC4364584; doi:10.1186/s12915-015-0124-6), 2015-02-13
Supplement: 12915_2015_124_MOESM5_ESM.pdf [file 12915_2015_124_MOESM5_ESM.pdf]

Bounty : ATTTTCTTTACTATTTTTGAATATAACCTTTTAAACACTCACTGCAACACTCATGCAAACCATGAGACTCATATGCCAATTAATAAATAAAAAAAAAATATGGCAATTAATGCATTA  
V85331 : ATTTTCTTTACTATTTTTGAATATAACCTTTTAAACACTCACTGCAACACTCATGCAAACCATGAGACTCATATGCCAATTAATAAATAAAAAAAAAATATGGCAATTAATGCATTA  
Glowing Star : ATTTTCTTTACTATTTTTGAATATAACCTTTTAAACACTCACTGCAACACTCATGCAAACCATGAGACTCATATGCCAATTAATAAATAAAAAAAAAATATGGCAATTAATGCATTA  
VABM29 : ATTTTCTTTACTATTTTTGAATATAACCTTTTAAACACTCACTGCAACACTCATGCAAACCATGAGACTCATATGCCAATTAATAAATAAAAAAAAAATATGGCAATTAATGCATTA

Bounty : TGCATGCATTGCAATAAGTATGGGACCTACAACACTCATTTGAATCGCATATACCTTCTTTGCCATATATTTTGAAAAAAAAAAAATCAAAATATATACATTTCCATATAAATATTTAA  
V85331 : TGCATGCATTGCAATAAGTATGGGACCTACAACACTCATTTGAATCGCATATACCTTCTTTGCCATATATTTTGAAAAAAAAAAAATCAAAATATATACATTTCCATATAAATATTTAA  
Glowing Star : TGCATGCATTGCAATAAGTATGGGACCTACAACACTCATTTGAATCGCATATACCTTCTTTGCCATATATTTTGAAAAAAAAAAAATCAAAATATATACATTTCCATATAAATATTTAA  
VABM29 : TGCATGCATTGCAATAAGTATGGGACCTACAACACTCATTTGAATCGCATATACCTTCTTTGCCATATATTTTGAAAAAAAAAAAATCAAAATATATACATTTCCATATAAATATTTAA

Bounty : AATTGATTGTTTTTAAAGAATGGTTTTTGAAGAATATTTCAATGATACAATTTTAAGAAGATAACTACTAATTTGAAGCTATTAATTTGTACCATTGCAAAATACAAATACAAATTAAT  
V85331 : AATTGATTGTTTTTAAAGAATGGTTTTTGAAGAATATTTCAATGATACAATTTTAAGAAGATAACTACTAATTTGAAGCTATTAATTTGTACCATTGCAAAATACAAATACAAATTAAT  
Glowing Star : AATTGATTGTTTTTAAAGAATGGTTTTTGAAGAATATTTCAATGATACAATTTTAAGAAGATAACTACTAATTTGAAGCTATTAATTTGTACCATTGCAAAATACAAATACAAATTAAT  
VABM29 : AATTGATTGTTTTTAAAGAATGGTTTTTGAAGAATATTTCAATGATACAATTTTAAGAAGATAACTACTAATTTGAAGCTATTAATTTGTACCATTGCAAAATACAAATACAAATTAAT

Bounty : TCAATATATGTCAAATAAATCAATCAATCAACTATTGAACAACCATGATAGATGCTCTTAAACGATAATTTAGGCTGATTATTATCAATTTGAAACACATCTTAATTTGTTTTTC  
V85331 : TCAATATATGTCAAATAAATCAATCAATCAACTATTGAACAACCATGATAGATGCTCTTAAACGATAATTTAGGCTGATTATTATCAATTTGAAACACATCTTAATTTGTTTTTC  
Glowing Star : TCAATATATGTCAAATAAATCAATCAATCAACTATTGAACAACCATGATAGATGCTCTTAAACGATAATTTAGGCTGATTATTATCAATTTGAAACACATCTTAATTTGTTTTTC  
VABM29 : TCAATATATGTCAAATAAATCAATCAATCAACTATTGAACAACCATGATAGATGCTCTTAAACGATAATTTAGGCTGATTATTATCAATTTGAAACACATCTTAATTTGTTTTTC

Bounty : CAGTCTCTTCTATTTGGTATCAACCTTATAAGTTACTAAAAAACAAATAAGAAAAAGAAAAATAGGCAGATATTTATATATATTATTTATATAAATAAATAAAAAAGAACAGAAATGACGTG  
V85331 : CAGTCTCTTCTATTTGGTATCAACCTTATAAGTTACTAAAAAACAAATAAGAAAAAGAAAAATAGGCAGATATTTATATATATTATTTATATAAATAAATAAAAAAGAACAGAAATGACGTG  
Glowing Star : CAGTCTCTTCTATTTGGTATCAACCTTATAAGTTACTAAAAAACAAATAAGAAAAAGAAAAATAGGCAGATATTTATATATATTATTTATATAAATAAATAAAAAAGAACAGAAATGACGTG  
VABM29 : CAGTCTCTTCTATTTGGTATCAACCTTATAAGTTACTAAAAAACAAATAAGAAAAAGAAAAATAGGCAGATATTTATATATATTATTTATATAAATAAATAAAAAAGAACAGAAATGACGTG

Bounty : CACGCGAAACAACATGGGGCTAAGAAAAATAAACATGAACATTCGGTGGGGAAGAAAAATAATAAATAAATAGGCGGGAGGTGATACTGTAATAAGTTGAAAAATGCAGGGGTAA  
V85331 : CACGCGAAACAACATGGGGCTAAGAAAAATAAACATGAACATTCGGTGGGGAAGAAAAATAATAAATAAATAGGCGGGAGGTGATACTGTAATAAGTTGAAAAATGCAGGGGTAA  
Glowing Star : CACGCGAAACAACATGGGGCTAAGAAAAATAAACATGAACATTCGGTGGGGAAGAAAAATAATAAATAAATAGGCGGGAGGTGATACTGTAATAAGTTGAAAAATGCAGGGGTAA  
VABM29 : CACGCGAAACAACATGGGGCTAAGAAAAATAAACATGAACATTCGGTGGGGAAGAAAAATAATAAATAAATAGGCGGGAGGTGATACTGTAATAAGTTGAAAAATGCAGGGGTAA  
\*\*\*\*\*

Bounty : CGTTGAAGTTGGCAGATGGGAACGCAAACCTTGGACGTTACCAAGCGATGCAAAGAACACGTGTTTGAACCTGAAACCGACGGGTGGTAAGGCCACCGGGACAATTTTTTTTAAAA  
V85331 : CGTTGAAGTTGGCAGATGGGAACGCAAACCTTGGACGTTACCAAGCGATGCAAAGAACACGTGTTTGAACCTGAAACCGACGGGTGGTAAGGCCACCGGGACAATTTTTTTTAAAA  
Glowing Star : CGTTGAAGTTGGCAGATGGGAACGCAAACCTTGGACGTTACCAAGCGATGCAAAGAACACGTGTTTGAACCTGAAACCGACGGGTGGTAAGGCCACCGGGACAATTTTTTTTAAAA  
VABM29 : CGTTGAAGTTGGCAGATGGGAACGCAAACCTTGGACGTTACCAAGCGATGCAAAGAACACGTGTTTGAACCTGAAACCGACGGGTGGTAAGGCCACCGGGACAATTTTTTTTAAAA

Bounty : ATAAACATCAGTAGACCTCGGAA-GGTGAGAGGAACCCGCCTTTTAAAAA-CACCCATATATTCCTCGTGTCTTAACTCAAACCCCACTAATAATTAATAAACCACTAAATAAACACA  
V85331 : ATAAACATCAGTAGACCTCGGAA-GGTGAGAGGAACCCGCCTTTTAAAAA-CACCCATATATTCCTCGTGTCTTAACTCAAACCCCACTAATAATTAATAAACCACTAAATAAACACA  
Glowing Star : ATAAACATCAGTAGACCTCGGAAAGGTTGAGAGGAACCCGCCTTTTAAAAA-CACCCATATATTCCTCGTGTCTTAACTCAAACCCCACTAATAATTAATAAACCACTAAATAAACACA  
VABM29 : ATAAACATCAGTAGACCTCGGAA-GGTGAGAGGAACCCGCCTTTTAAAAA-CACCCATATATTCCTCGTGTCTTAACTCAAACCCCACTAATAATTAATAAACCACTAAATAAACACA

Bounty : TAAATTTTTATTAATAAATAAGCAGAGATAAGCCTCTCTCTCTCTCTCTCTCTCTCTCAGAGGAAGATGTAGATAAAGCCATAAGGGGTAGAGAGAGAGGAGAGAGGG  
V85331 : TAAATTTTTATTAATAAATAAGCAGAGATAAGCCTCTCTCTCTCTCTCTCTCTCTCTCTCTCTCTCTCAGAGGAAGATGTAGATAAAGCCATAAGGGGTAGAGAGAGAGGAGAGAGGG  
Glowing Star : TAAATTTTTATTAATAAATAAGCAGAGATAAGCCTCTCTCTCTCTCTCTCTCTCTCTCTCTCTCTCTCAGAGGAAGATGTAGATAAAGCCATAAGGGGTAGAGAGAGAGGAGAGAGGG  
VABM29 : TAAATTTTTATTAATAAATAAGCAGAGATAAGCCTCTCTCTCTCTCTCTCTCTCTCTCTCTCTCTCTCAGAGGAAGATGTAGATAAAGCCATAAGGGGTAGAGAGAGAGGAGAGAGGG

Bounty : CTATAAGTCTTCTCTCAGTACATGAAGAAAAGAGTATAAAGAGAGCTTGTTCAGCGCCAAGACTGATACCTGCCATATTTGTCTGTCTTTATTTTTTATATTTTTGCGTCTAGAAAAG  
V85331 : CTATAAGTCTTCTCTCAGTACATGAAGAAAAGAGTATAAAGAGAGCTTGTTCAGCGCCAAGACTGATACCTGCCATATTTGTCTGTCTTTATTTTTTATATTTTTGCGTCTAGAAAAG  
Glowing Star : CTATAAGTCTTCTCTCAGTACATGAAGAAAAGAGTATAAAGAGAGCTTGTTCAGCGCCAAGACTGATACCTGCCATATTTGTCTGTCTTTATTTTTTATATTTTTGCGTCTAGAAAAG  
VABM29 : CTATAAGTCTTCTCTCAGTACATGAAGAAAAGAGTATAAAGAGAGCTTGTTCAGCGCCAAGACTGATACCTGCCATATTTGTCTGTCTTTATTTTTTATATTTTTGCGTCTAGAAAAG

Bounty : GGTAAAAAATGGATTTTGAGTTGTGGGTTGTGTGATTGTGAATTTGGGTCGGCGAGAATG : 1230  
V85331 : GGTAAAAAATGGATTTTGAGTTGTGGGTTGTGTGATTGTGAATTTGGGTCGGCGAGAATG : 1229  
Glowing Star : GGTAAAAAATGGATTTTGAGTTGTGGGTTGTGTGATTGTGAATTTGGGTCGGCGAGAATG : 1231  
VABM29 : GGTAAAAAATGGATTTTGAGTTGTGGGTTGTGTGATTGTGAATTTGGGTCGGCGAGAATG : 1230

**Text S2: *PpJAZ1* promoter sequences isolated from different peach varieties.** The 1226 bp sequence upstream the translational start site of *PpJAZ1* was isolated from the genomic library of ‘VABM29’, ‘Bounty’, ‘Glowing Star’ and ‘V85331’ peach varieties. Alignment of promoter sequences using Clustal X identified four SNPs and two INDELs among peach varieties. Further analysis of promoter sequences using PlantPAN web tool showed that one of these INDELs is located within the binding site of AINTEGUMENTA transcription factor as pointed by the red stars.
