# Supplementary material for: A stable JAZ protein from peach mediates the transition from outcrossing to self-pollination
Source: PubMed Central journal article supplement (PMC4364584; doi:10.1186/s12915-015-0124-6), 2015-02-13
Supplement: 12915_2015_124_MOESM8_ESM.pdf [file 12915_2015_124_MOESM8_ESM.pdf]

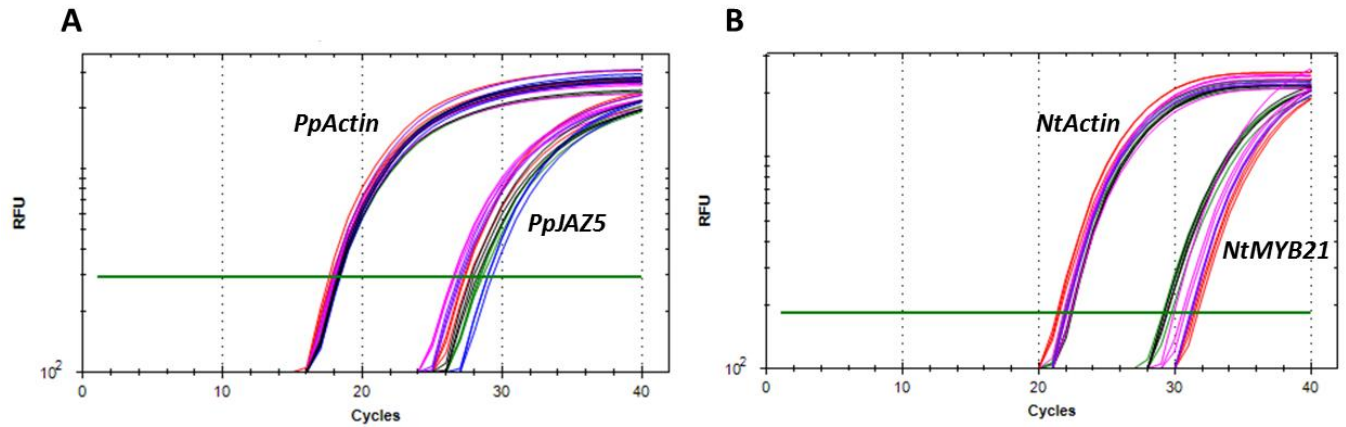

**Figure S4: The uniformity of  $\beta$ -Actin expression in different samples.** The qRT-PCR amplification plot for *PpActin*, *PpJAZ5* (a), *NtActin* and *NtMYB21* (b) in cDNAs generated from peach and tobacco flowers, respectively. X-axis shows the number of PCR cycles and the Y-axis shows the relative fluorescent units (RFU). The amplification plot was generated for six cDNA samples and three technical replicates for each sample.
